# Supplementary material
Source: MDPI journal article supplement (https://www.mdpi.com/2673-4532/3/1/2)
Supplement: s1 [file s1]

# Simple Analytical Strategy for Screening Three Synthetic Cathinones ( $\alpha$ -PVT, $\alpha$ -PVP, and MDPV) in Oral Fluids

André M. Segurado <sup>1</sup>, Samir M. Ahmad <sup>1,2,3,\*</sup>, Nuno R. Neng <sup>1,4</sup>, Margarida M. Maniés-Sequeira <sup>5</sup>, Helena Gaspar <sup>4,5,6,\*</sup> and José Manuel F. Nogueira <sup>1,4,\*</sup>

<sup>1</sup> Centro de Química Estrutural, Institute of Molecular Sciences, Faculdade de Ciências, Universidade de Lisboa, Campo Grande, 1749-016 Lisboa, Portugal; segurado.csi@gmail.com (A.M.S.); ndneng@fc.ul.pt (N.R.N.)

<sup>2</sup> Molecular Pathology and Forensic Biochemistry Laboratory, Centro de Investigação Interdisciplinar Egas Moniz (CiiEM), Instituto Universitário Egas Moniz (IUEM), Campus Universitário—Quinta da Granja, Monte da Caparica, 2829-511 Caparica, Portugal

<sup>3</sup> Forensic and Psychological Sciences Laboratory Egas Moniz, Campus Universitário—Quinta da Granja, Monte da Caparica, 2829-511 Caparica, Portugal

<sup>4</sup> Departamento de Química e Bioquímica, Faculdade de Ciências, Universidade de Lisboa, Campo Grande, 1749-016 Lisboa, Portugal

<sup>5</sup> BioISI—Biosystems & Integrative Sciences Institute, Faculdade de Ciências, Universidade de Lisboa, Campo Grande, 1749-016 Lisboa, Portugal; margarida.m.sequeira352@gmail.com

<sup>6</sup> MARE—Marine and Environmental Sciences Centre, Polytechnic of Leiria, 2520-630 Peniche, Portugal

\* Correspondence: smahmad@egasmoniz.edu.pt (S.M.A.); hmgaspar@fc.ul.pt (H.G.); nogueira@fc.ul.pt (J.M.F.N.)

## NMR structural analysis for methylone, MDPV, MDPPP and $\alpha$ -PVT.

Methylone: RMN <sup>1</sup>H (400 MHz, DMSO-d<sub>6</sub>)  $\delta$  (ppm): 9.69 (1H, brs, NH), 9.17 (1H, brs, NH), 7.69 (1H, dd, J=8.2, 1.5 Hz, H-6'), 7.53 (1H, d, J=1.5 Hz, H-2'), 7.13 (1H, d, J=8.2 Hz, H-5'), 6.19 (2H, s, H-7'), 5.06 (1H, m, H-2), 2.54 (3H, brs, N-CH<sub>3</sub>), 1.42 (3H, d, J=7.1 Hz, H-3). RMN <sup>13</sup>C (100 MHz, DMSO-d<sub>6</sub>)  $\delta$  (ppm): 194.38 (C=O, C-1), 152.77 (Cq, C-4'), 148.26 (Cq, C-3'), 127.41 (Cq, C-1'), 125.88 (CH, C-6'), 108.60 (CH, C-5'), 107.94 (CH, C-2'), 102.53 (O-CH<sub>2</sub>-O, C-7'), 57.98 (CH, C-2), 30.67 (N-CH<sub>3</sub>), 15.79 (CH<sub>3</sub>, C-3).

MDPV: RMN <sup>1</sup>H (400 MHz, DMSO-d<sub>6</sub>)  $\delta$  (ppm): 10.26 (1H, brs, NH), 7.77 (1H, dd, J=8.2, 1.4 Hz, H-6'), 7.57 (1H, d, J=1.4 Hz, H-2'), 7.16 (1H, d, J=8.2 Hz, H-5'), 6.20 (2H, s, H-7'), 5.45 (1H, m, H-2), 3.60/3.22 and 3.44/2.99 (4H, m, H-1''/H-4'', N-CH<sub>2</sub>), 2.12-1.80 (4H, m, H-2''/H-3''), 1.90 (2H, m, H-3), 1.11 (2H, m, H-4), 0.79 (3H, t, J=7.2 Hz, H-5). RMN <sup>13</sup>C (100 MHz, DMSO-d<sub>6</sub>)  $\delta$  (ppm): 194.55 (C=O, C-1), 153.20 (Cq, C-4'), 148.38 (Cq, C-3'), 128.97 (Cq, C-1'), 126.25 (CH, C-6'), 108.65 (CH, C-5'), 107.86 (CH, C-2'), 102.69 (O-CH<sub>2</sub>-O, C-7'), 67.16 (CH, C-2), 53.82 and 51.90 (N-CH<sub>2</sub>, C-1''/C-4''), 32.09 (CH<sub>2</sub>, C-3), 22.83 (CH<sub>2</sub>, C-2''/C-3''), 17.36 (CH<sub>2</sub>, C-4), 13.74 (CH<sub>3</sub>, C-5).

MDPPP: RMN <sup>1</sup>H (400 MHz, DMSO-d<sub>6</sub>)  $\delta$  (ppm): 10.69 (1H, brs, NH), 7.70 (1H, brd, J=8.0 Hz, H-6'), 7.53 (1H, brs, H-2'), 7.14 (1H, d, J=8.0 Hz, H-5'), 6.19 (2H, s, H-7'), 5.41 (1H, m, H-1), 3.60/3.18 and 3.49/3.01 (4H, m, H-1''/H-4'', N-CH<sub>2</sub>), 2.11-1.81 (4H, m, H-2''/H-3''), 1.48 (3H, d, J=6.8 Hz, H-3). RMN <sup>13</sup>C (100 MHz, DMSO-d<sub>6</sub>)  $\delta$  (ppm): 194.37 (C=O, C-1), 152.95 (Cq, C-4'), 148.30 (Cq, C-3'), 126.05 (CH, C-6'), 108.65 (CH, C-5'), 108.00 (CH, C-2'), 102.60 (O-CH<sub>2</sub>-O, C-7'), 63.83 (CH, C-1), 53.04 and 51.81 (N-CH<sub>2</sub>, C-1''/C-4''), 23.10 (CH<sub>2</sub>, C-2''/C-3''), 16.16 (CH<sub>3</sub>, C-3).

$\alpha$ -PVT: RMN <sup>1</sup>H (400 MHz, DMSO-d<sub>6</sub>)  $\delta$  (ppm): 10.74 (1H, brs, NH), 8.32 (1H, d, J=3.2 Hz, H-2'), 8.27 (1H, d, J=4.4 Hz, H-4'), 7.37 (1H, dd, J=4.4, 3.2 Hz, H-3'), 5.40 (1H, m, H-2), 3.62/3.23 and 3.42/3.06 (4H, m, H-1''/H-4''), 1.95 (2H, m, H-3), 2.06-1.85 (4H, m, H-2''/H-3''), 1.18 (2H, m, H-4), 0.83 (3H, t, J=7.3 Hz, H-5). RMN <sup>13</sup>C (100 MHz, DMSO-d<sub>6</sub>)  $\delta$  (ppm): 189.02 (C=O, C-1), 141.73 (Cq, C-1'), 138.69 (CH, C-4'), 136.61 (CH, C-2'), 129.58 (CH, C-3'), 67.14 (CH, C-2), 53.10 and 52.02 (N-CH<sub>2</sub>, C-1''/C-4''), 32.17 (CH<sub>2</sub>, C-3), 22.82 (CH<sub>2</sub>, C-2''/C-3''), 17.89 (CH<sub>2</sub>, C-4), 13.72 (CH<sub>3</sub>, C-5).

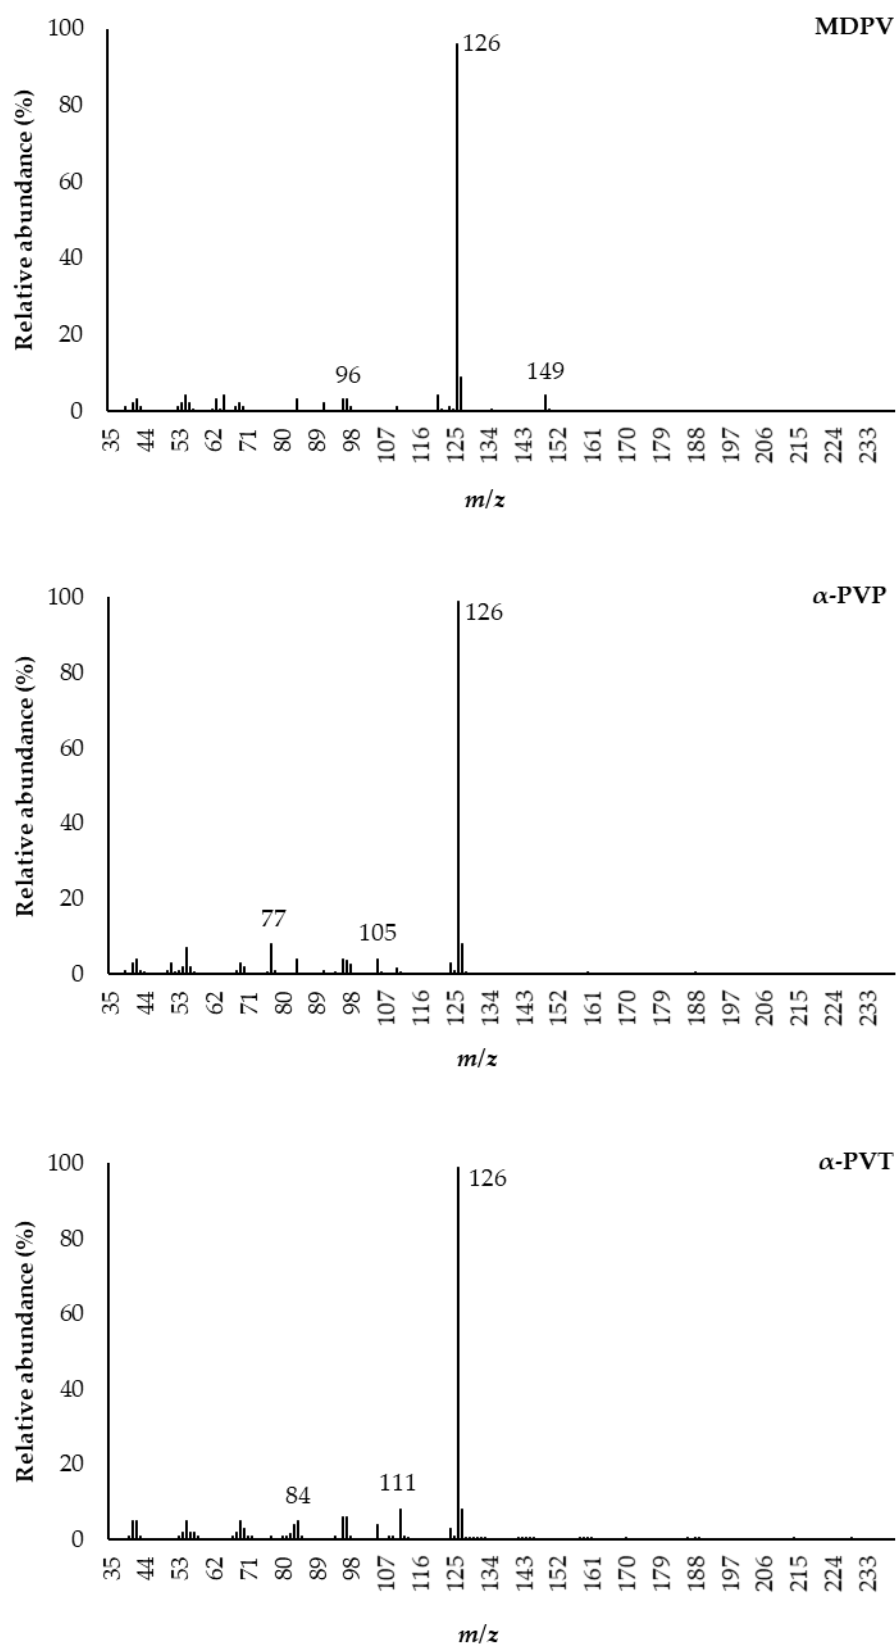

**Figure S1.** Mass spectra of α-PVP, α-PVT and MDPV obtained by GC-MS under full-scan mode.

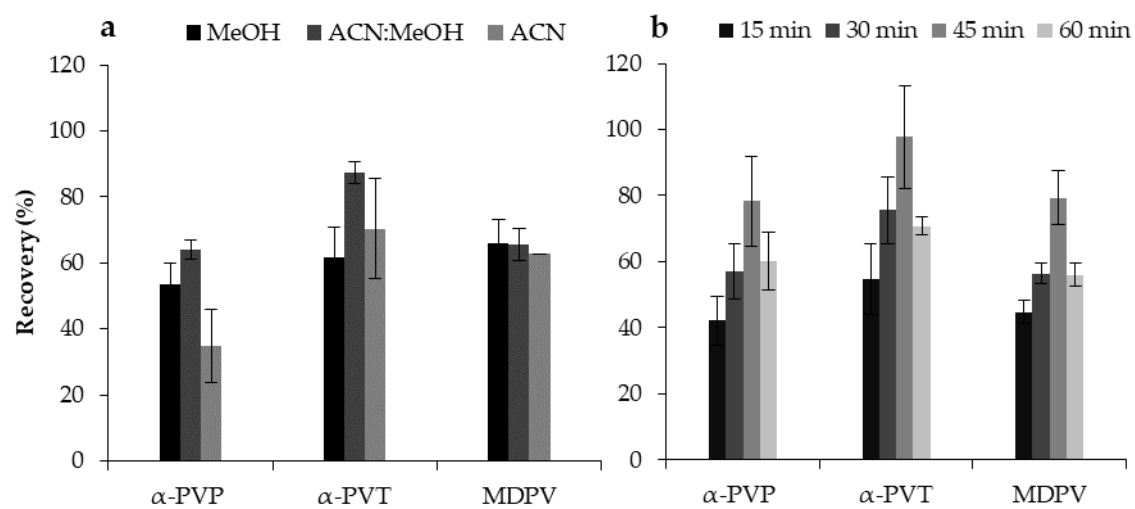

**Figure S2.** Effect of the back-extraction solvent (a) time (b) on the microextraction of the three SCs in aqueous media, obtained by BA $\mu$ E- $\mu$ LD/GC-MS(SIM). The error bars represent the standard deviation of three replicates.

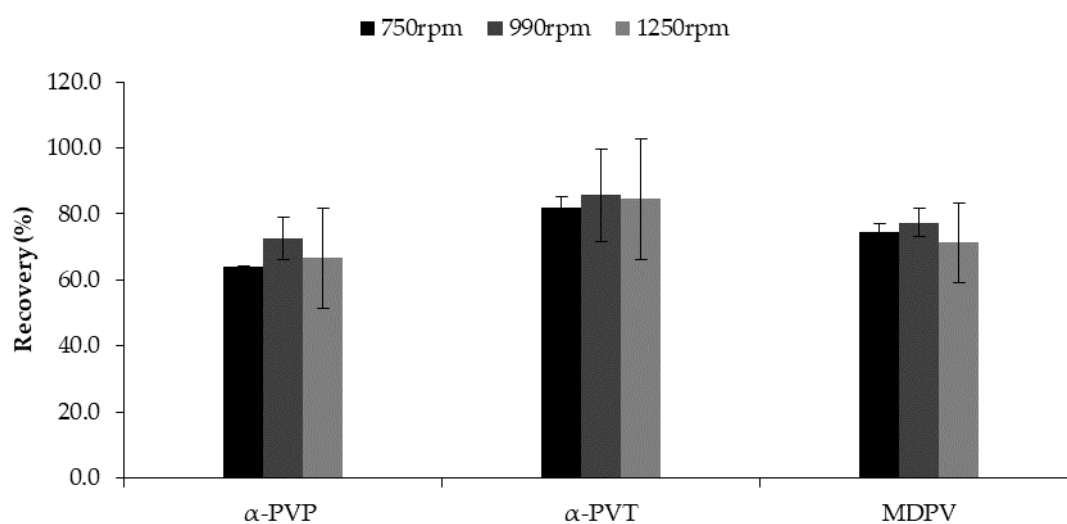

**Figure S3.** Effect of stirring rate on the microextraction of the three SCs in aqueous media, obtained by BA $\mu$ E- $\mu$ LD/GC-MS(SIM). The error bars represent the standard deviation of three replicates.

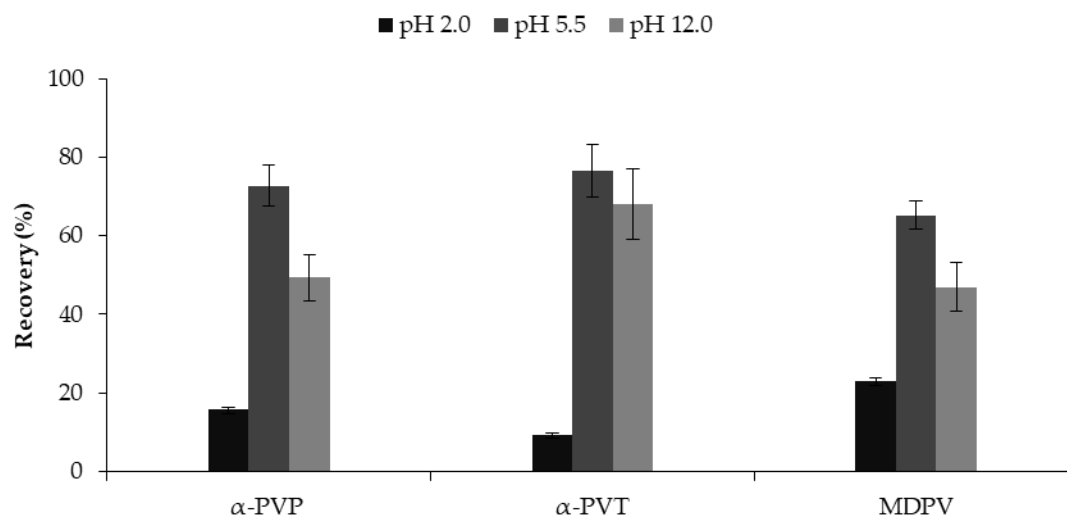

**Figure S4.** Effect matrix pH on the microextraction of the three SCs in aqueous media, obtained by BAμE-μLD/GC-MS(SIM). The error bars represent the standard deviation of three replicates.

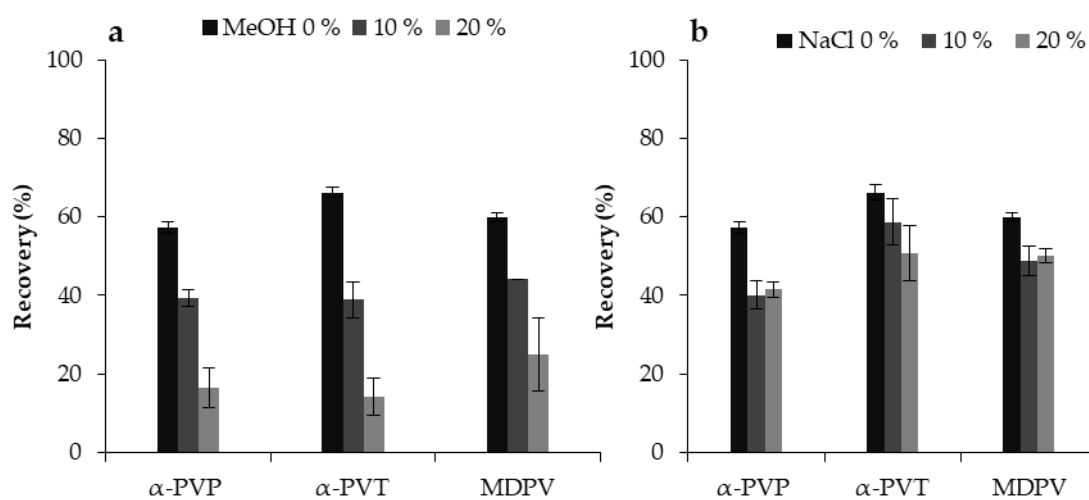

**Figure S5.** Effect of matrix MeOH (a) and NaCl (b) content on the microextraction of the three SCs in aqueous media, obtained by BAμE-μLD/GC-MS(SIM). The error bars represent the standard deviation of three replicates.
